# Supplementary material
Source: publisher figshare collection journal article supplement (https://karger.figshare.com/ndownloader/files/17888690)
Supplement: Supplementary file 1 [file 17888690]

Online Supplementary Material

Table S1. Incidence relative ratio of ischemic stroke stratified by age and sex per 100,000 population in 2003-2004 and 2015-2016 in Matão, Brazil

| Ischemic stroke | | | | | | | | | | |
| --- | --- | --- | --- | --- | --- | --- | --- | --- | --- | --- |
| **Total** | | | | | | | | | | |
| 2004-2004 | | | | | 20015-2016 | | | | | |
| Age group | Person/year | n | Rate | 95% CI | Person/year | n | Rate | 95% CI | IRR (95% CI) | |
| <45 | 58,429 | 4 | 7 | 1.9–17.5 | 51,568 | 2 | 4 | 0.5–1430 | 0.56 (0.72–3.19) | |
| 45–54 | 7,733 | 8 | 103 | 44.7–203.7 | 11,058 | 5 | 45 | 14.7–105.5 | 0.43 (0.13–1.35) | |
| 55–64 | 4,475 | 22 | 492 | 308.3–743.4 | 8,793 | 9 | 102 | 46.8–194.2 | 0.20 (0.09–0.45) | |
| 65–74 | 2,905 | 22 | 757 | 475.2–1144.4 | 4,720 | 21 | 445 | 275.6–679.3 | 0.59 (0.32–1.08) | |
| ≥75 | 1,511 | 13 | 860 | 458.9–1466.7 | 2,751 | 30 | 1090 | 736.5–1553.1 | 1.27 (0.67–2.51) | |
| All ages  Adjusted | 75,053 | 69 | 92 | 71.5–116.3 | 78,890 | 67 | 85 | 65.8–-107.8 | 0.93 (0.66–1.92) | |
| Brazil |  |  | 108 | 89.0-129.9 |  |  | 65 | 50.6-82.3 | 0.60 (0.44-0.82) | |
| World |  |  | 116 | 96.3-138.6 |  |  | 69 | 54.1-86.8 | 0,59 (0.44-0.80) | |
| **Male** | | | | | | | | | | |
| Age group | Person/year | n | Rate | 95% CI | Person/year | n | Rate | 95% CI | IRR (95% CI) | |
| <45 | 29,348 | 2 | 7 | 0.8–24.6 | 25,936 | 1 | 4 | 0.1–21.5 | 0.56 (0.12–7.38) | |
| 45–54 | 3,965 | 6 | 151 | 55.6–329.1 | 5,349 | 4 | 75 | 20.4–191.4 | 0.49 (0.12–1.80) | |
| 55–64 | 2,190 | 14 | 639 | 349.9–1070.3 | 4,286 | 6 | 140 | 51.4–304.4 | 0.21 (0.08–0.56) | |
| 65–74 | 1,373 | 12 | 874 | 452.4–1521.7 | 2,236 | 15 | 671 | 375.9–1104.0 | 0.77 (0.36–1.68) | |
| ≥75 | 646 | 9 | 1393 | 639.0–2628.2 | 1,150 | 7 | 609 | 245.1–1250.1 | 0.44 (0.15–1.17) | |
| All ages | 37,522 | 43 | 145 | 82.9–154.3 | 38,957 | 33 | 85 | 58.3–118.9 | 0.74 (0.47–1.16) | |
| **Female** | | | | | | | | | | |
| Age group | Person/year | n | Rate | 95% CI | Person/year | n | Rate | 95% CI | IRR (95% CI) | |
| <45 | 29,081 | 2 | 7 | 0.8–24.8 | 25,632 | 1 | 4 | 0.1–21.7 | | 0.56 (0.02–7.46) |
| 45–54 | 3,768 | 2 | 53 | 6.4–191.6 | 5,709 | 1 | 17 | 0.4–97.6 | | 0.33 (0.12–4.34) |
| 55–64 | 2,285 | 8 | 350 | 151.3–688.7 | 4,507 | 3 | 667 | 13.7–194.4 | | 0.19 (0.04–0.69) |
| 65–74 | 1,532 | 10 | 652 | 313.4–1197.1 | 2,484 | 6 | 241 | 88.7–525.0 | | 0.37 (0.12–1.02) |
| ≥75 | 865 | 4 | 462 | 126.1–1179.7 | 1,601 | 23 | 1437 | 912.8–2147.9 | | 3.11 (1.15–10.5) |
| All ages | 37,531 | 26 | 69 | 49.3–101.5 | 39,933 | 34 | 85 | 59.0–119.0 | | 1.23 (0.73–2.07) |
| IRR= incidence relative ratio.  Table S2. Incidence relative ratio of hemorrhagic stroke stratified by age and sex per 100,000 population in 2003-2004 and 2015-2016 in Matão, Brazil | | | | | | | | | | |
| Total | | | | | | | | | | |
| Age group | Person/year | n | Rate | 95% CI | Person/year | n | Rate | 95% CI | IRR (95% CI) | |
| <45 | 58,429 | 0 | 0 | …. | 51,568 | 0 | 0 | .... | .... | |
| 45–54 | 7,733 | 1 | 13 | 0.3–72.0 | 11,058 | 1 | 9 | 0.2–50.4 | 0.70 (0.02–27.3) | |
| 55–64 | 4,475 | 4 | 89 | 24.4–228.7 | 8,793 | 4 | 45 | 12.4–116.4 | 0.51 (0.11–0.26) | |
| 65–74 | 2,905 | 4 | 138 | 37.5–352.2 | 4,720 | 3 | 64 | 13.1–185.6 | 0.46 (0.09–2.23) | |
| ≥75 | 1,511 | 2 | 133 | 16.0–477.3 | 2,751 | 2 | 73 | 8.8–262.4 | 0.55 (0.57–5.27) | |
| All ages  Adjusted | 75,053 | 11 | 15 | 7.3–26.2 | 78,890 | 10 | 13 | 6.1–23.3 | 0.86 (0.36–2.07) | |
| Brazil |  |  | 18 | 11.0-28.0 |  |  | 10 | 5.1-17.8 | 0,56 (0.25-1.2) | |
| World |  |  | 20 | 12.6-30.3 |  |  | 10 | 5.1-17.8 | 0.5 (0.22-1.1) | |
| Male | | | | | | | | | | |
| Age group | Person/year | n | Rate | 95% CI | Person/year | n | Rate | 95% CI | IRR (95% CI) | |
| <45 | 29,348 | 0 | ….. | …. | 25,936 | 0 | .... | .... | .... | |
| 45–54 | 3,965 | 1 | 25 | 0.6–140.4 | 5,349 | 1 | 19 | 0.5–104.1 | 0.74 (0.02–28.9) | |
| 55–64 | 2,190 | 3 | 137 | 28.3–399.8 | 4,286 | 2 | 47 | 5.7–168.5 | 0.34 (0.04–2.29) | |
| 65–74 | 1,373 | 3 | 218 | 45.1–637.2 | 2,236 | 3 | 134 | 27.7–391.6 | 0.61 (0.10–3.57) | |
| ≥75 | 646 | 0 | …. | ….. | 1,150 | 1 | 87 | 2.2–483.5 | .... | |
| All ages | 37,522 | 7 | 19 | 7.5–38.4 | 38957 | 7 | 18 | 7.2–37.0 | 0.96 (0.32–2.87) | |
| Female | | | | | | | | | | |
| Age group | Person/year | n | Rate | 95% CI | Person/year | n | Rate | 95% CI | IRR (95% CI) | |
| <45 | 29,081 | 0 | …. | …. | 25,632 | 0 | .... | .... | .... | |
| 45–54 | 3,768 | 0 | …. | …. | 5.709 | 0 | .... | .... | .... | |
| 55–64 | 2,285 | 1 | 44 | 1.1–243.6 | 4,507 | 2 | 44 | 5.4–160.2 | 1.01 (0.08–29.91) | |
| 65–74 | 1,532 | 1 | 65 | 1.7–363.1 | 2,484 | 0 | .... | .... | .... | |
| ≥75 | 865 | 2 | 231 | 28.0–832.7 | 1,601 | 1 | 62 | 1.6–347.5 | 0.27 (0.01–3.55) | |
| All ages | 37,531 | 4 | 11 | 2.9–27.3 | 39,933 | 3 | 7 | 1.5–22.0 | 0.70 (0.13–3.41) | |

IRR= incidence relative ratio.
